# Supplementary material for: Polyurethanes based on lignin-derived metabolic intermediate with strong adhesion to metals
Source: Royal Society of Chemistry journal article supplement (doi:10.1039/d2py01128j), 2022-01-01
Supplement: d2py01128j1.pdf [file d2py01128j1.pdf]

## Supplementary Information

Polyurethanes based on lignin-derived metabolic intermediate  
with strong adhesion to metals

Ye Cheng,<sup>a</sup> Keiichi Kuboyama,<sup>a</sup> Shuichi Akasaka,<sup>a</sup> Takuma Araki,<sup>b</sup> Eiji Masai,<sup>c</sup>  
Masaya Nakamura<sup>b</sup> and Tsuyoshi Michinobu<sup>\*,a</sup>

<sup>a</sup>Department of Materials Science and Engineering, Tokyo Institute of Technology,  
Tokyo 152-8552, Japan.

<sup>b</sup>Department of Forest Resource Chemistry, Forestry and Forest Products Research  
Institute, Tsukuba, Ibaraki 305-8687, Japan.

<sup>c</sup>Department of Materials Science and Bioengineering, Nagaoka University of  
Technology, Nagaoka, Niigata 940-2188, Japan.

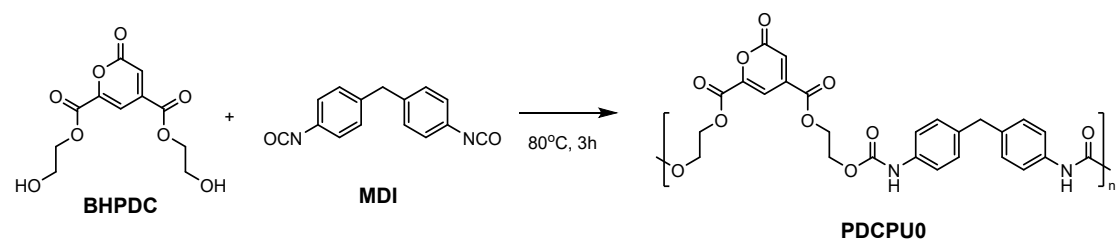

**Scheme S1** Synthesis of PDCPU0.

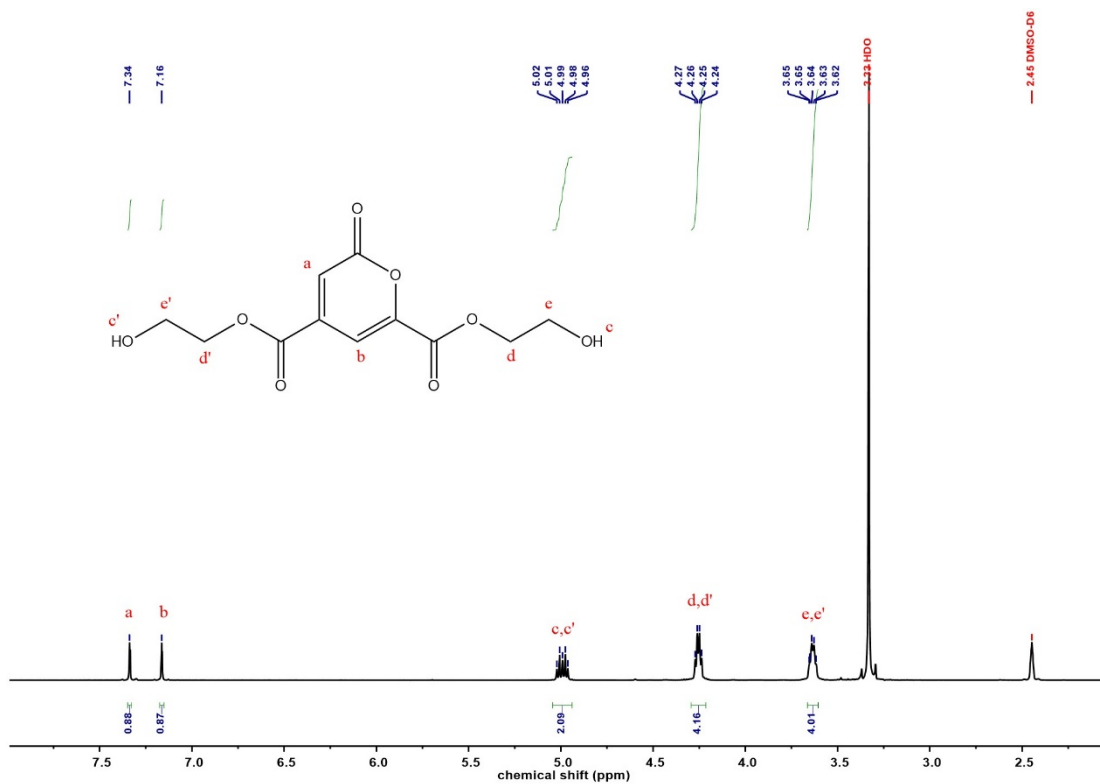

**Fig. S1** <sup>1</sup>H NMR spectrum (400 MHz, DMSO-*d*<sub>6</sub>, 298 K) of bis(2-hydroxyethyl) 2-oxo-2H-pyran-4,6-dicarboxylate (BHPDC).

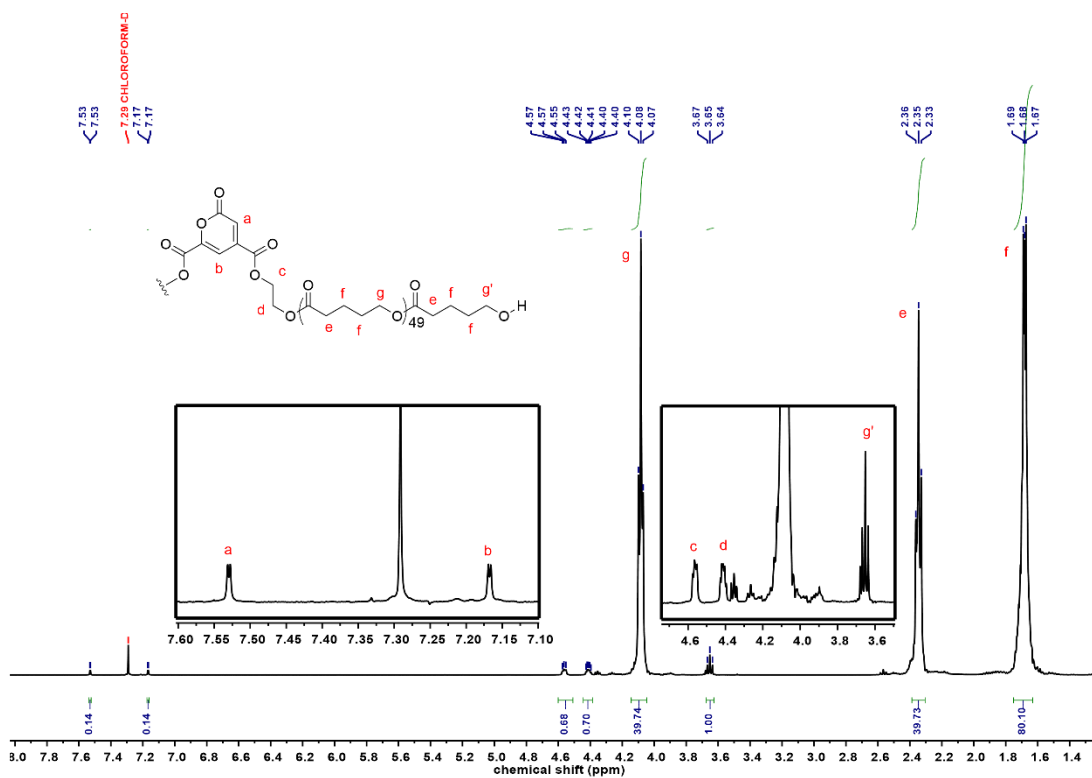

**Fig. S2** <sup>1</sup>H NMR spectrum (400 MHz, CDCl<sub>3</sub>, 298 K) of PVL50.

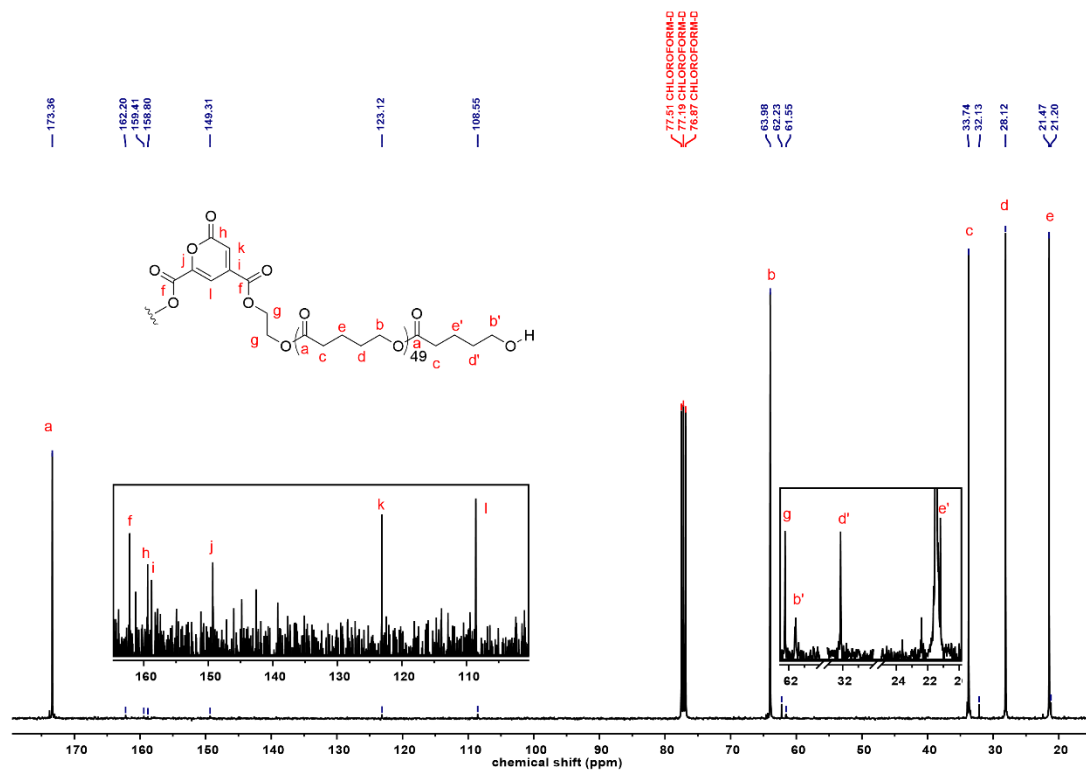

**Fig. S3** <sup>13</sup>C NMR spectrum (400 MHz, CDCl<sub>3</sub>, 298 K) of PVL50.

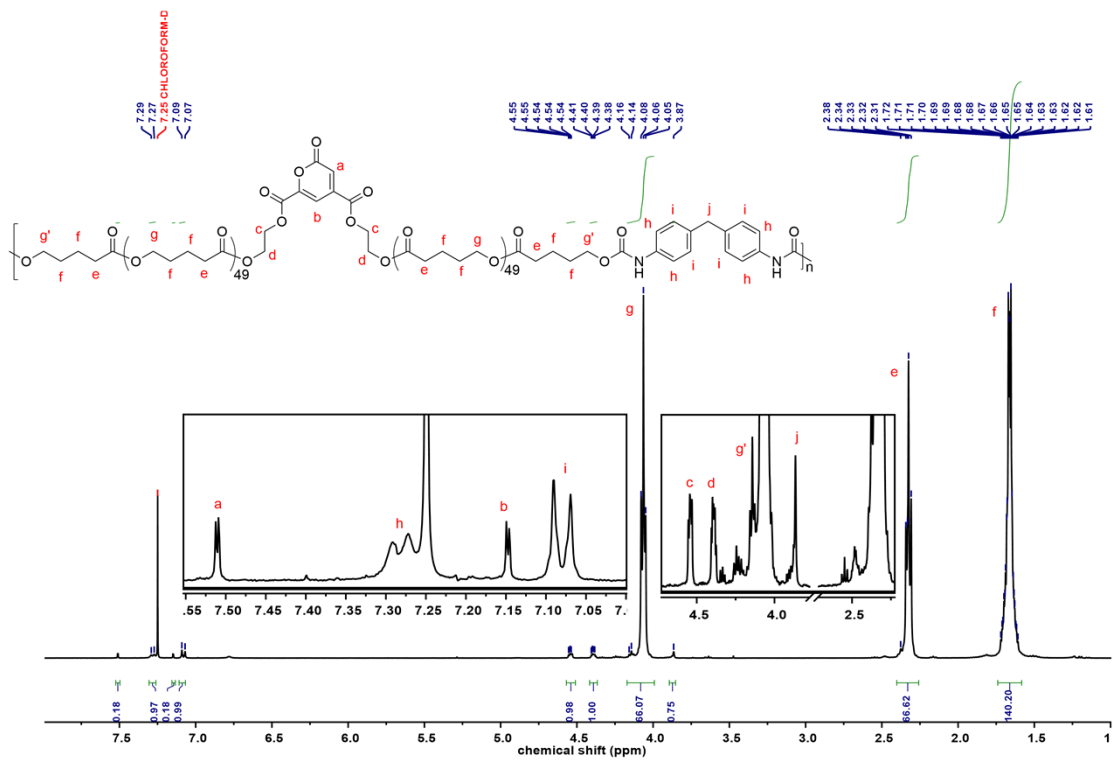

Fig. S4  $^1\text{H}$  NMR spectrum (400 MHz,  $\text{CDCl}_3$ , 298 K) of PDCPU50.

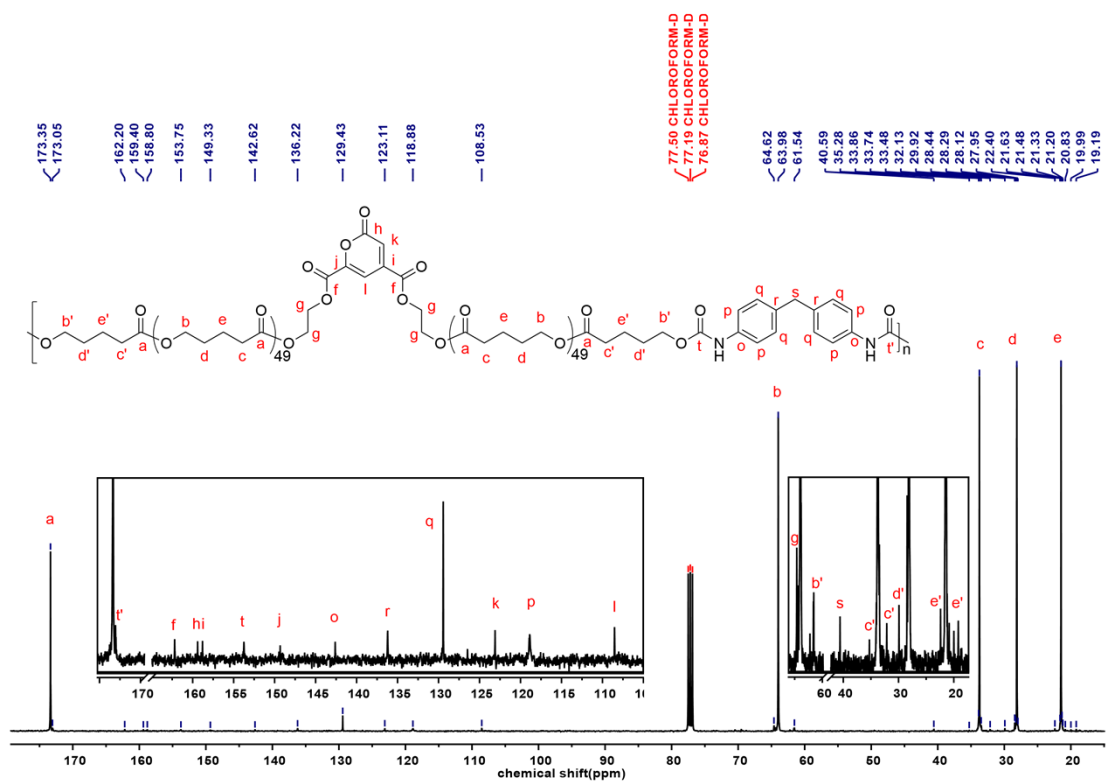

Fig. S5  $^{13}\text{C}$  NMR spectrum (400 MHz,  $\text{CDCl}_3$ , 298 K) of PDCPU50.

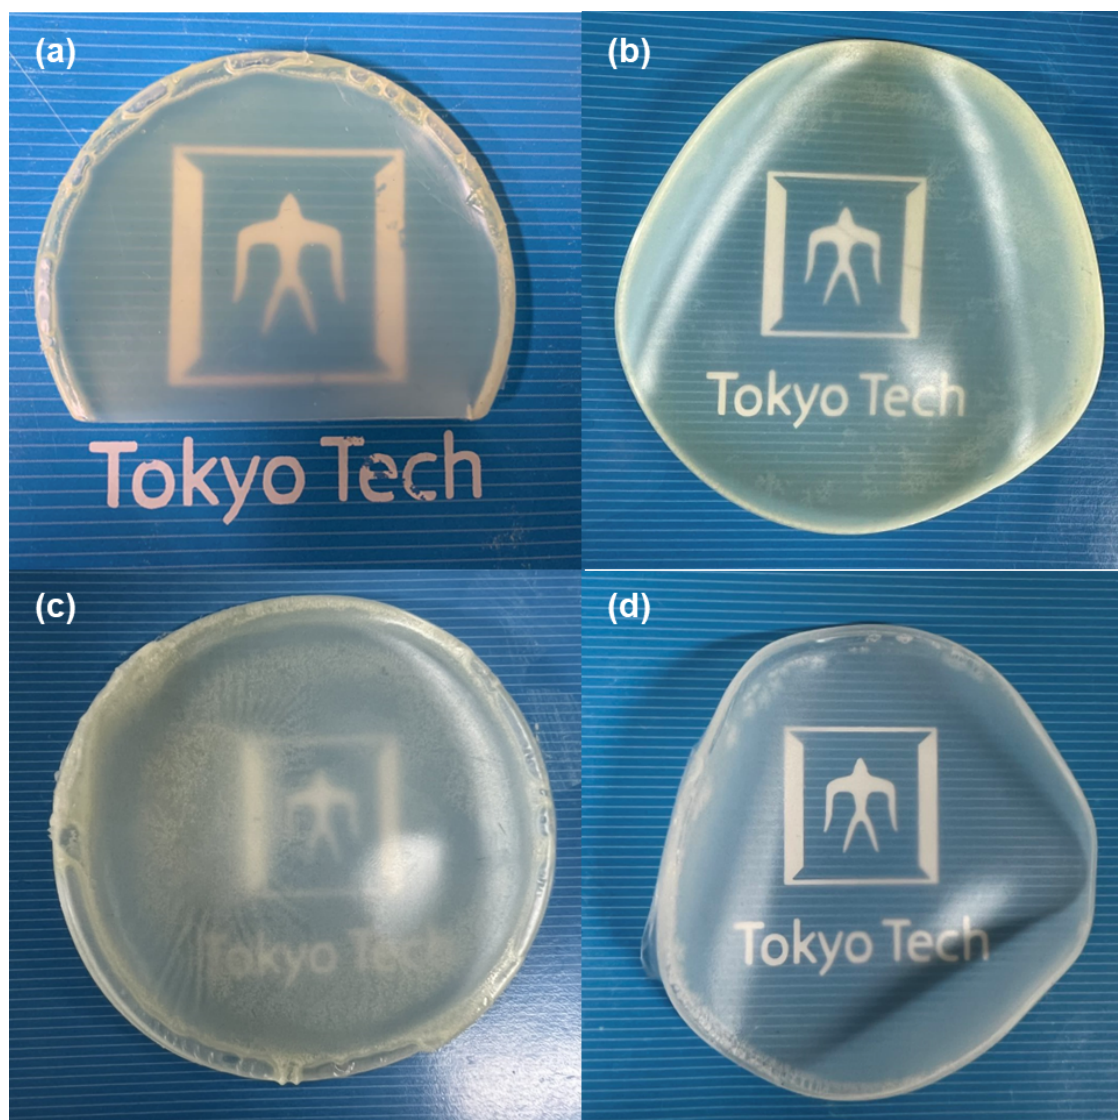

**Fig. S6** PU films formed by solvent casting: (a) PDCPU20; (b) PDCPU30; (c) PDCPU50; (d) EGPU20.

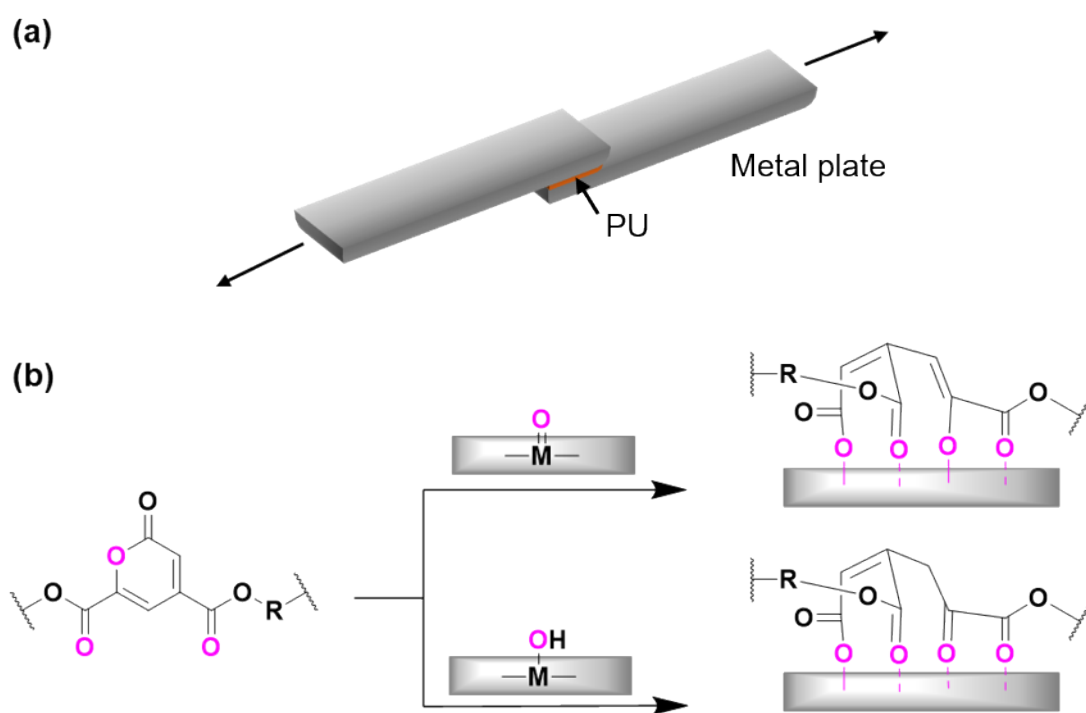

**Fig. S7** (a) Illustration of adhesive measurement and (b) anticipated reaction mechanism at the adhesion interface.
